# Supplementary material for: Controllable high-performance liquid marble micromixer
Source: Royal Society of Chemistry journal article supplement (doi:10.1039/d2lc00017b), 2022-01-01
Supplement: d2lc00017b1.pdf [file d2lc00017b1.pdf]

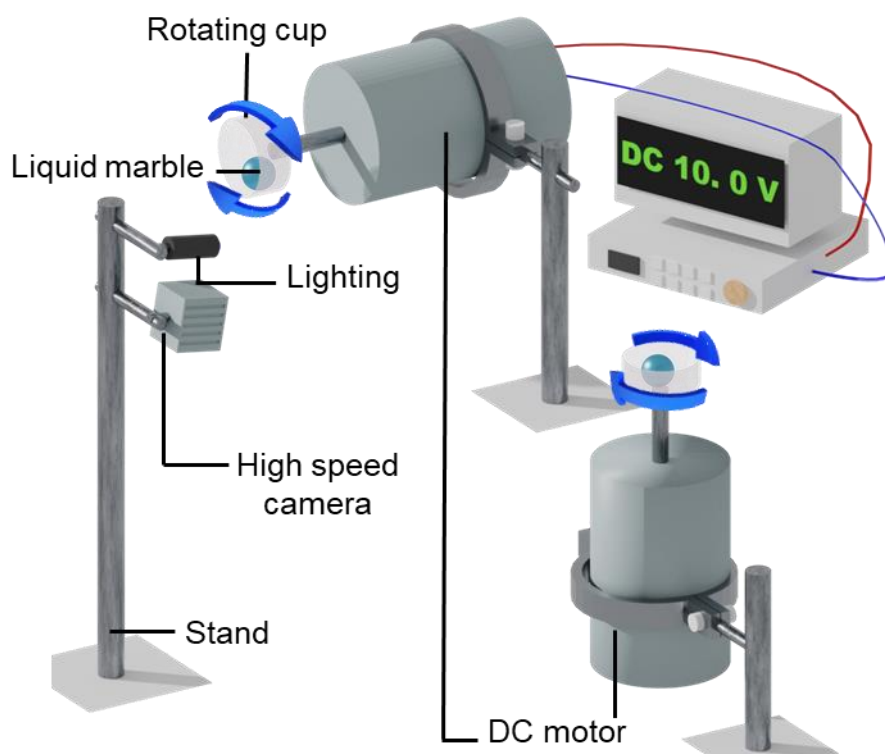

Figure S. Experimental setup to rotate the liquid marble around the horizontal axis and around the vertical axis.
